# Supplementary material for: Two species of Thoracostomopsidae (Nematoda: Enoplida) from Jeju Island, South Korea
Source: PeerJ. 2020 Apr 28;8:e9037. doi: 10.7717/peerj.9037 (PMC7194091; doi:10.7717/peerj.9037)
Supplement: Supplemental Information 1 — Types, accession numbers and other notes labelled respectively. [file peerj-08-9037-s001.xlsx]

## Sheet: Sheet1
	males			females
Characters	holotype	paratype 1	paratype 2	allotype	paratype 1	paratype 2	paratype 3	paratype 4	paratype 5
	NIBRIV0000858255	NIBRIV0000858262	NIBRIV0000858257	NIBRIV0000858256	NIBRIV0000858258	NIBRIV0000858259	NIBRIV0000858260	NIBRIV0000858261	NIBRIV0000858263
		Used for SEM							Used for SEM
body length	2107	2213	2307	2097	1851	2263	2292	2187	2128
maximum body diameter	36	33	35	44	39	47	39	45	40
diameter at the level of cephalic setae	29	30	29	34	18	33	32	28	31
length of inner labial setae	11	18	14	16	19	16	17	17	19
length of outer labial setae	43	30	39	40	48	41	40	39	45
length of cephalic setae	15	18	11	20	20	13	17	15	18
distance from anterior to cephalic setae	13	23	19	23	27	24	25	19	22
width at cephalic capsule end	34	34	34	38	32	38	38	36	38
mandible length	12	11	10	13	10	10	13	11	12
tooth length	5	5	5	5	5	6	6	6	6
buccal cavity length	18	29	25	30	26	29	30	30	30
distance from nerve ring from anterior end	127	137	117	136	119	143	138	137	125
pharynx (oesophagus) length	510	543	529	492	488	539	558	552	517
corresponding body diameter at pharynx	36	33	35	41	36	42	39	40	40
cardia length	13	8	10	12	7	10	9	8	10
tail length	130	121	123	120	100	111	122	114	119
anal body diameter	31	33	29	36	29	32	32	31	36
c'	4.19355	3.66667	4.24138	3.33333	3.44828	3.46875	3.8125	3.67742	3.30556
spicule length as arc	39	36	34	n/a	n/a	n/a	n/a	n/a	n/a
spicule length as arc / anal body diameter	1.25806	1.09091	1.17241	n/a	n/a	n/a	n/a	n/a	n/a
length of gubernaculum	12	12	11	n/a	n/a	n/a	n/a	n/a	n/a
supplementary organ length	8	9	9	n/a	n/a	n/a	n/a	n/a	n/a
distance from cloacal opening to supplementary organ	82	87	86	n/a	n/a	n/a	n/a	n/a	n/a
distance from anterior end to vulva	n/a	n/a	n/a	1350	1170	1455	1456	1409	1287
corresponding body diameter at vulva	n/a	n/a	n/a	44	39	47	39	45	40
distance from anterior end to vulva as percentage of total body length	n/a	n/a	n/a	64.3777	63.2091	64.2952	63.5253	64.4262	60.4793
a	58.5278	67.0606	65.9143	47.6591	47.4615	48.1489	58.7692	48.6	53.2
b	4.13137	4.07551	4.36106	4.2622	3.79303	4.19852	4.10753	3.96196	4.11605
c	16.2077	18.2893	18.7561	17.475	18.51	20.3874	18.7869	19.1842	17.8824
									(when applicable µm)
